# Supplementary material
Source: publisher site journal article supplement (https://www.dovepress.com/article/supplementary_file/588402/588402_supplementary%20files.docx)
Supplement: Supplementary file 1 [file 588402_supplementary%20files.docx]

**
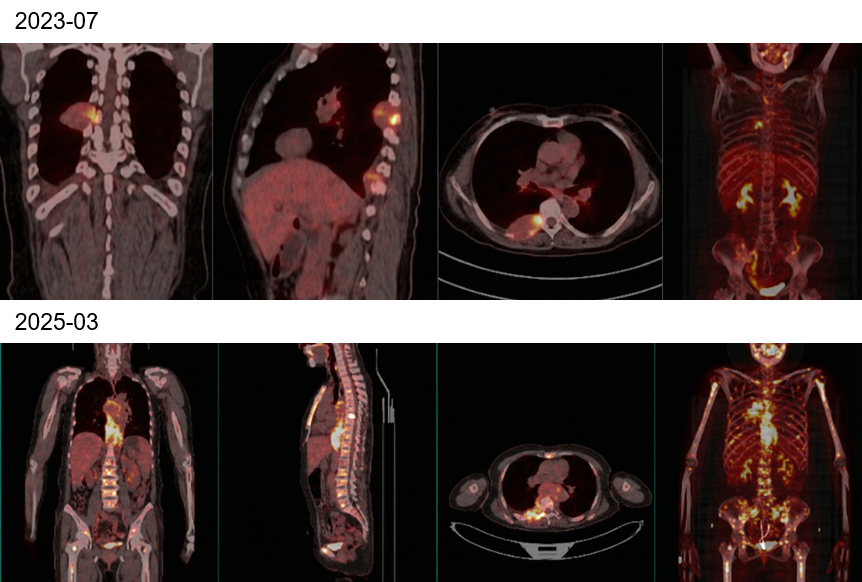
**

**Supplementary Figure 1.** PET/CT at diagnosis and relapse

**
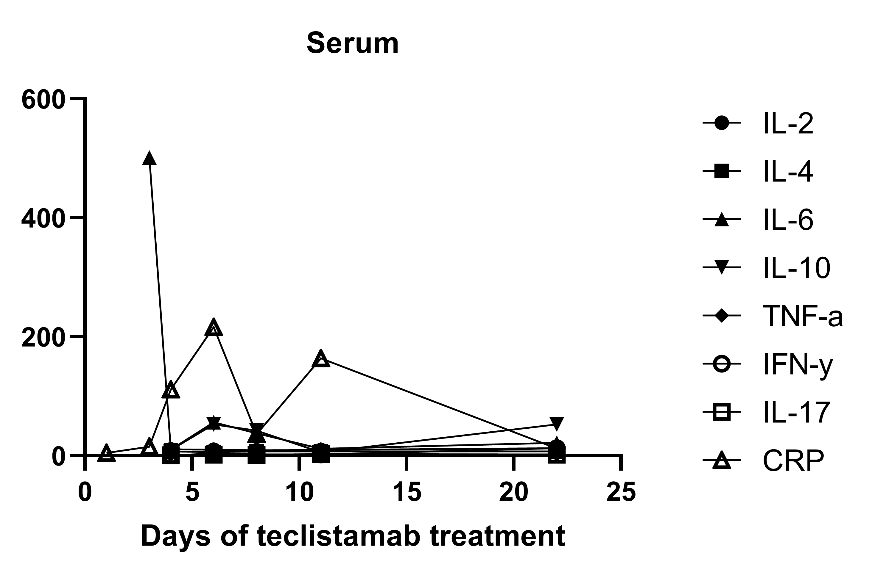
**

**
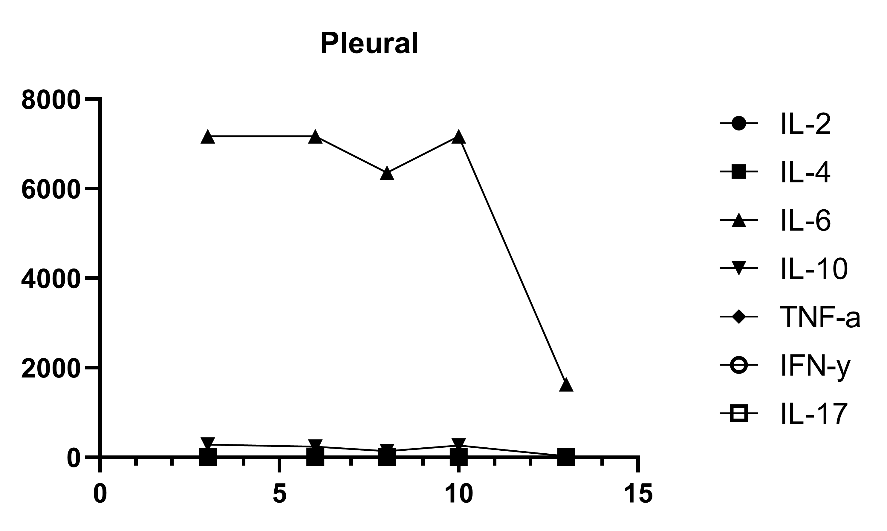
**

**Supplementary Figure 2.** (A) Cytokine levels in serum. (B) Cytokine levels in pleural fluid.
